# Supplementary material for: 3D flower-like NaHTi3O7 nanotubes as high-performance anodes for sodium-ion batteries
Source: Royal Society of Chemistry journal article supplement (doi:10.1039/c5ta03160e), 2015-01-01
Supplement: c5ta03160e1.pdf [file c5ta03160e1.pdf]

## SUPPORTING INFORMATION

### 3D flower-like $\text{NaHTi}_3\text{O}_7$ nanotubes as high-performance anodes for sodium-ion batteries

Shuai Wang, Wei Wang, Pan Zhan, Yan Yuan, Kailong Jiao, Handong Jiao, Shuqiang Jiao\*

*State Key Laboratory of Advanced Metallurgy, University of Science and Technology Beijing, Beijing*

*100083, PR China.*

*Email address: sjiao@ustb.edu.cn*

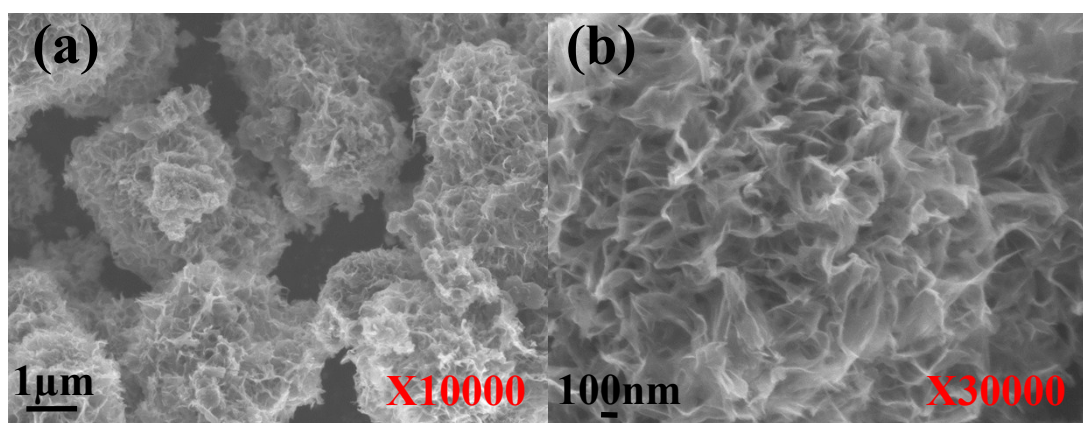

**Fig. S1 FE-SEM images of the as-prepared  $\text{NaHTi}_3\text{O}_7$  nanotubes at different magnifications.**

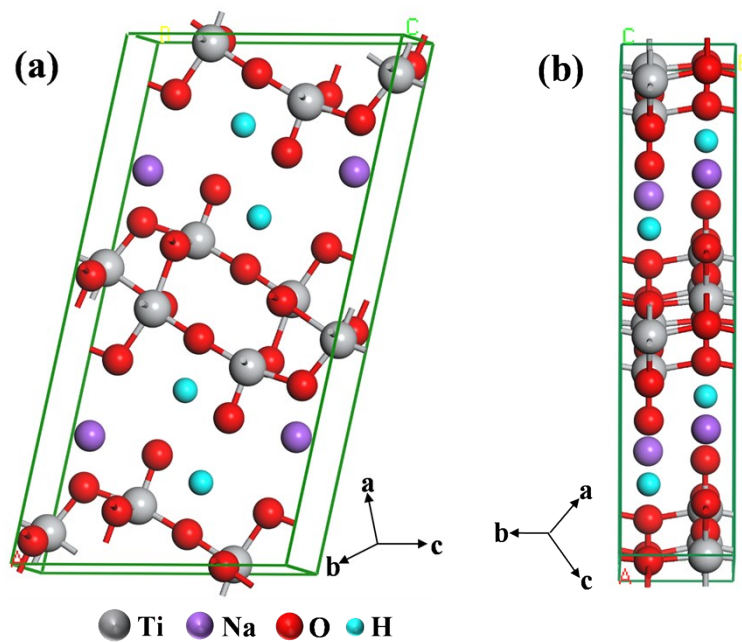

Fig. S2 Crystal structures of NaHTi<sub>3</sub>O<sub>7</sub>. (a) is viewed along the b axis. (b) is viewed along the c axis.

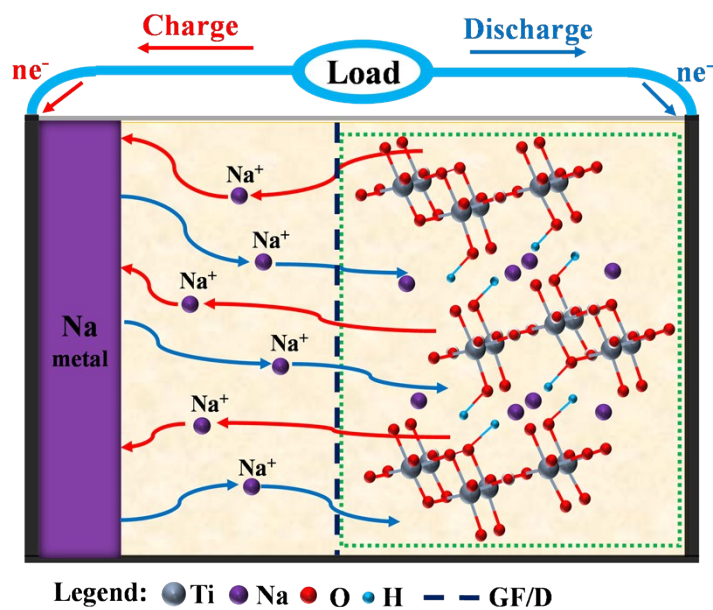

Fig. S3 Schematic representation of sodium-based half-battery system during charge/discharge process.

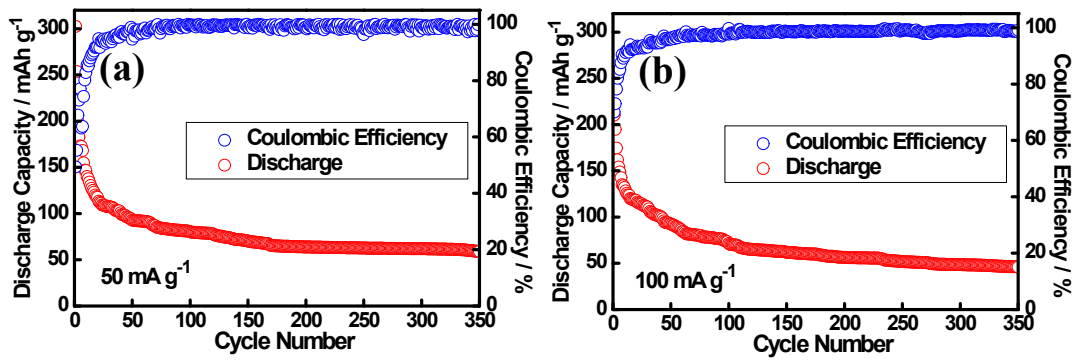

Fig. S4 The cycling performance and the coulombic efficiency at current densities of 50 mA g<sup>-1</sup> and 100 mA g<sup>-1</sup>, respectively.
